# Supplementary material for: Impact of air pollution exposure on cytokines and histone modification profiles at single-cell levels during pregnancy
Source: PubMed Central journal article supplement — Sci Adv. 2024 Nov 29;10(48):eadp5227. doi: 10.1126/sciadv.adp5227 (PMC11606498; doi:10.1126/sciadv.adp5227), 2024-11-29
Supplement: sciadv.adp5227_sm.pdf [file sciadv.adp5227_sm.pdf]

Supplementary Materials for  
**Impact of air pollution exposure on cytokines and histone modification  
profiles at single-cell levels during pregnancy**

Youn Soo Jung *et al.*

Corresponding author: Kari C. Nadeau, knadeau@hsph.harvard.edu

*Sci. Adv.* **10**, eadp5227 (2024)  
DOI: 10.1126/sciadv.adp5227

**This PDF file includes:**

Figs. S1 to S7  
Tables S1 to S4

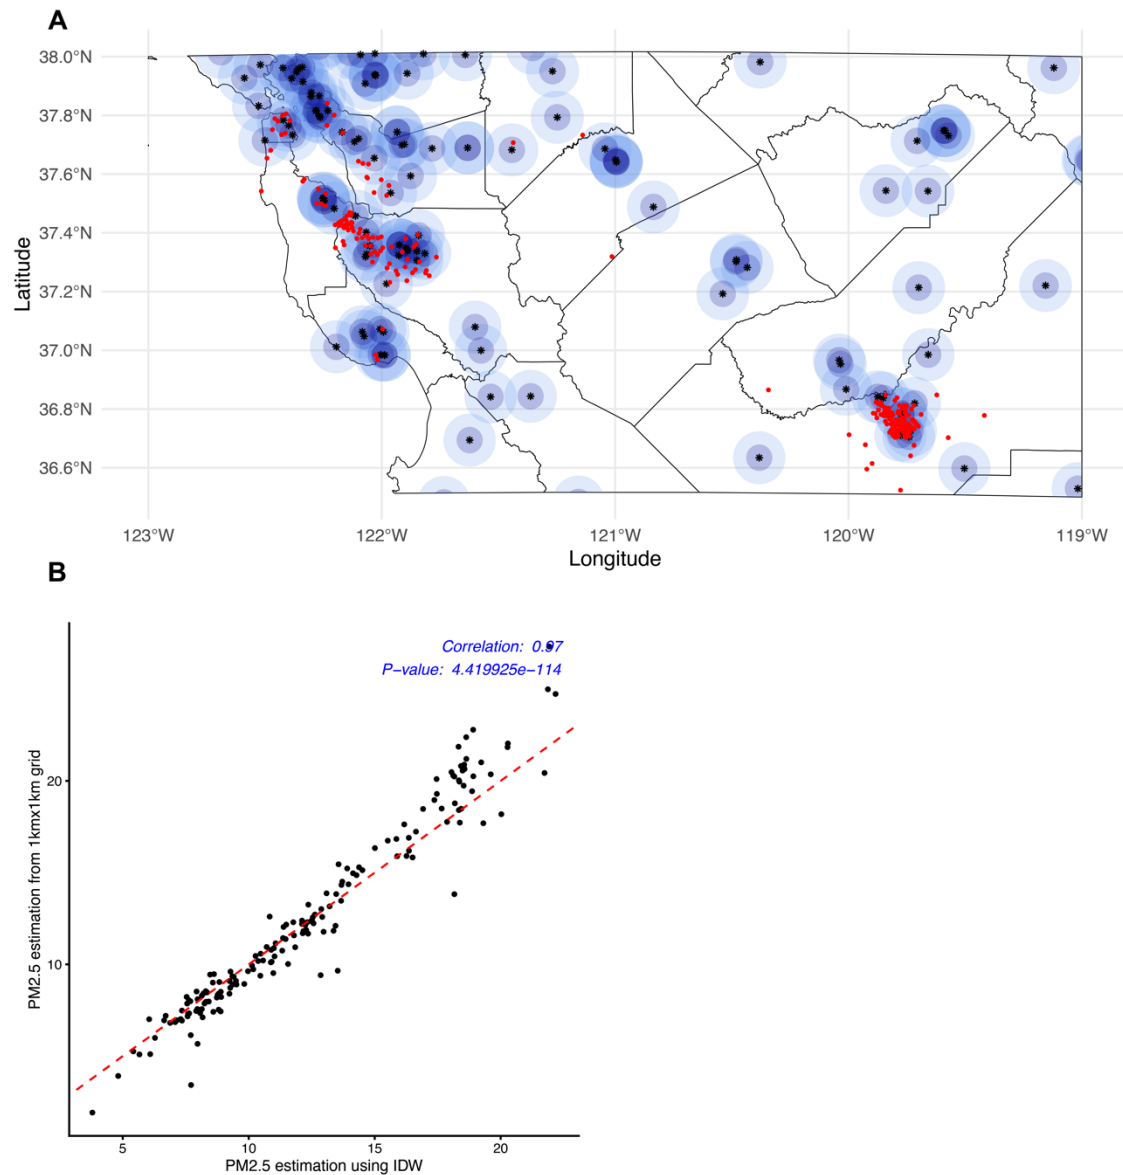

**Fig. S1. Location of the study population and the EPA central monitoring stations with 5km and 10km perimeters and PM<sub>2.5</sub> validation**

A. The map illustrates the residential locations of the study population and Environmental Protection Agency (EPA) Central ambient air pollution monitoring stations with 5km and 10km perimeters. Study participants are marked with red dots, while EPA stations are marked with black dots. Light blue and dark blue areas indicate the radius around EPA stations at 5km and 10km, respectively. The map shows that most study participants are located within 10km of the EPA monitoring stations.

B. The Pearson correlation plot between our 3-month average PM<sub>2.5</sub> estimates from the Inverse Distance Weighting method (IDW) and 3-month average PM<sub>2.5</sub> from the resolution of 1km grids data set (60, 57) indicates our PM<sub>2.5</sub> estimates are consistent with the high-resolution spatial PM estimates. The x-axis represents the PM<sub>2.5</sub> estimates ( $\mu\text{g}/\text{m}^3$ ) from the IDW used in the manuscript, while the y-axis shows the PM<sub>2.5</sub> estimates from Di et al. (57). The red dashed line indicates the 45-degree line.

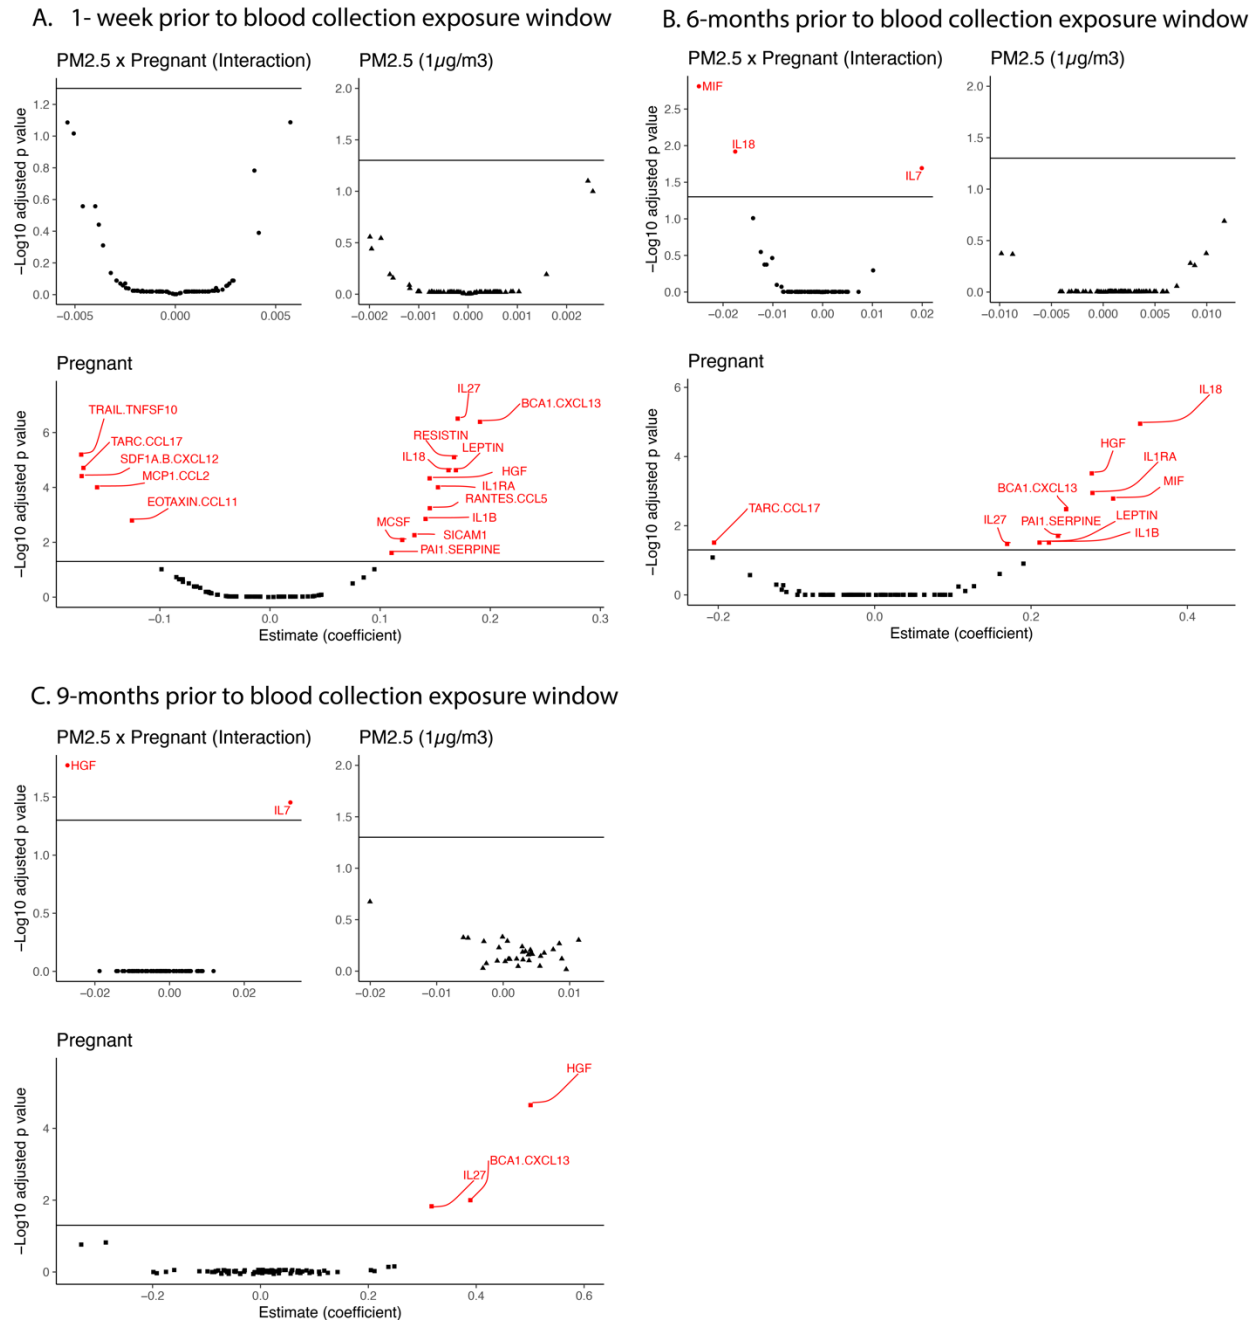

**Fig. S2. The association between the different PM<sub>2.5</sub> exposure windows and cytokine levels**

Volcano plots summarize the  $\beta$  coefficients and statistical significance for the association between marker levels and the average PM<sub>2.5</sub> levels ( $\mu\text{g}/\text{m}^3$ ) by pregnant status. For the sensitivity analysis, we used the different exposure windows, including (1) 1-week, (2) 6-month, (3) 9-month prior to blood collection. Multivariable regression was used to estimate the differential impact of PM<sub>2.5</sub> levels on the immune markers between pregnant versus non-pregnant women. The level of cytokine in the blood sample is a function of the PM<sub>2.5</sub> exposure level ( $\mu\text{g}/\text{m}^3$ ), pregnant status, the interaction between PM<sub>2.5</sub> and pregnant status, age, ethnicity

(Hispanic vs. not Hispanic), asthma status, and zipcode-level social deprivation index (SDI) score. Multiple testing corrections were performed by using  $FDR \geq 0.05$ . A  $\beta$  coefficient for the interaction between  $PM_{2.5}$  and pregnant status represents the relationship between cytokine levels and  $PM_{2.5}$  levels, comparing pregnant and non-pregnant women. A  $\beta$  coefficient of  $PM_{2.5}$  indicates that cytokine levels will change by  $\beta$  when  $PM_{2.5}$  increases by  $1 \mu\text{g}/\text{m}^3$ . A positive  $\beta$  coefficient for pregnant status represents the  $\beta$  difference in cytokine levels between pregnant and non-pregnant individuals.

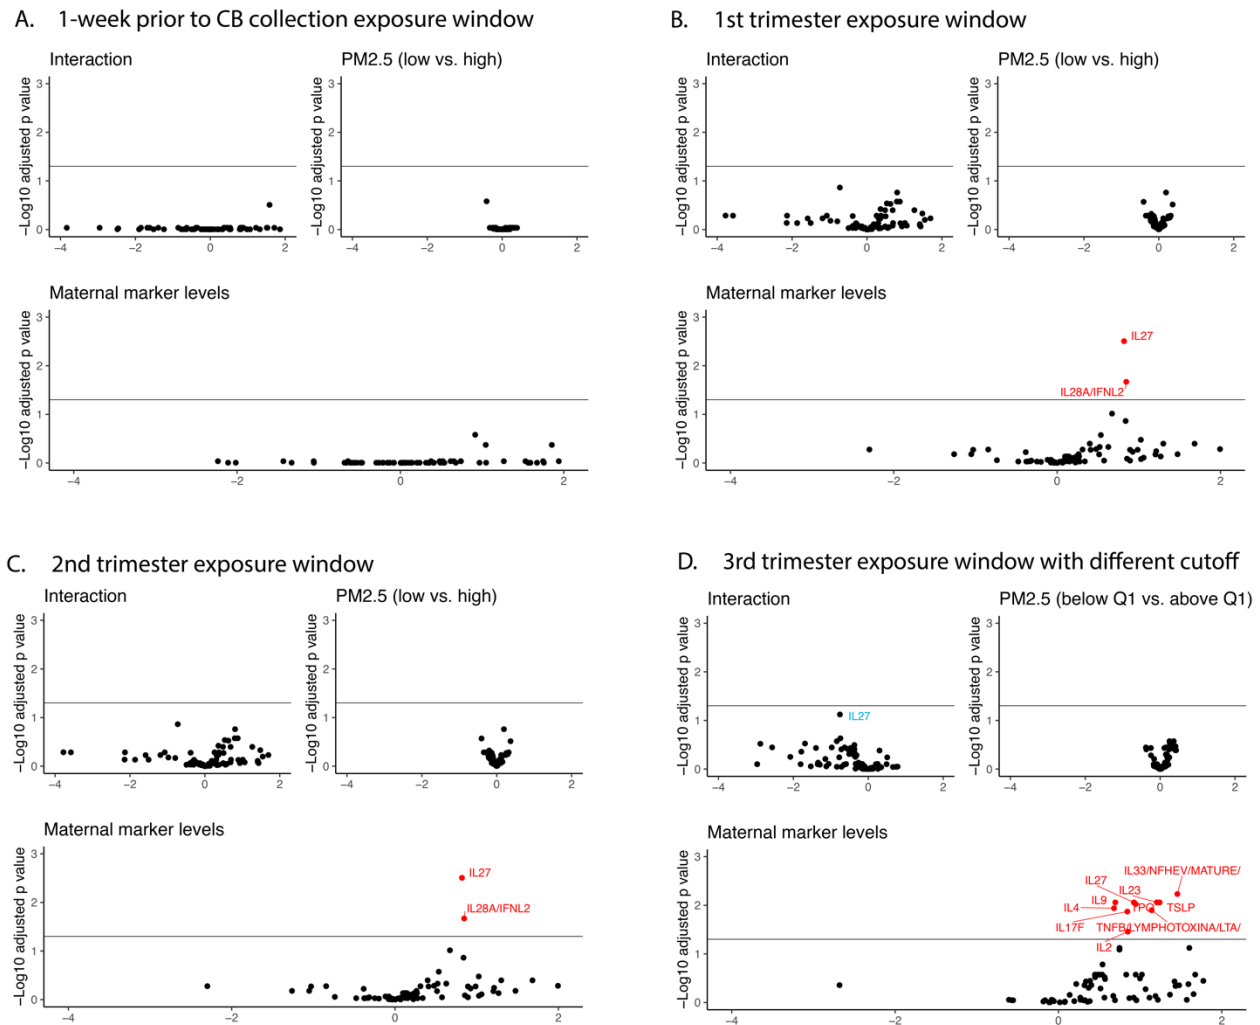

**Fig. S3. Impact of PM<sub>2.5</sub> exposure on neonatal-maternal cytokine associations by different exposure windows and cutoff points for sensitivity analysis**

(A)-(C): Volcano plots summarize the  $\beta$  coefficients and statistical significance for the association between maternal marker levels and cord blood (CB) markers, presented by the average PM<sub>2.5</sub> exposure window during the (A) 1 week prior to CB collection, as well as during the (B) first, and (C) second trimester.

(D): To check the robustness of our main analysis (Figure 3), different cutoff points were used to dichotomize the PM<sub>2.5</sub> exposure group, categorizing values below the 25th percentile as low exposure and values above the 25th percentile as high exposure.

(A)-(D): Multivariable regression was used to estimate the impact of prenatal PM<sub>2.5</sub> levels on the immune biomarkers in 33 CB samples. The level of cytokine in CB is a function of the level of matching cytokines in CB's mother, PM<sub>2.5</sub> exposure group (low vs. high; the cutoff point is 12  $\mu\text{g}/\text{m}^3$ ), the interaction between the mother's matching cytokine level and PM<sub>2.5</sub>, mother's age, ethnicity (Hispanic vs. not Hispanic), asthma status, and SDI score. Multiple testing corrections were performed by using FDR at 0.05. A positive  $\beta$  coefficient can be interpreted 1 unit increase in maternal cytokine will increase the cytokines level in CB by  $\beta$  estimates. A  $\beta$  coefficient of PM<sub>2.5</sub> (binary indicator; low vs. high) can be interpreted that cytokine levels in CB will change by  $\beta$  among high prenatal PM<sub>2.5</sub> exposure compared to the low exposure group. A  $\beta$  coefficient

for the interaction between maternal cytokine levels and PM<sub>2.5</sub> status represents the relationship between maternal cytokine levels and the corresponding cytokine levels in cord blood, comparing high maternal PM<sub>2.5</sub> exposure to low maternal PM<sub>2.5</sub> exposure.

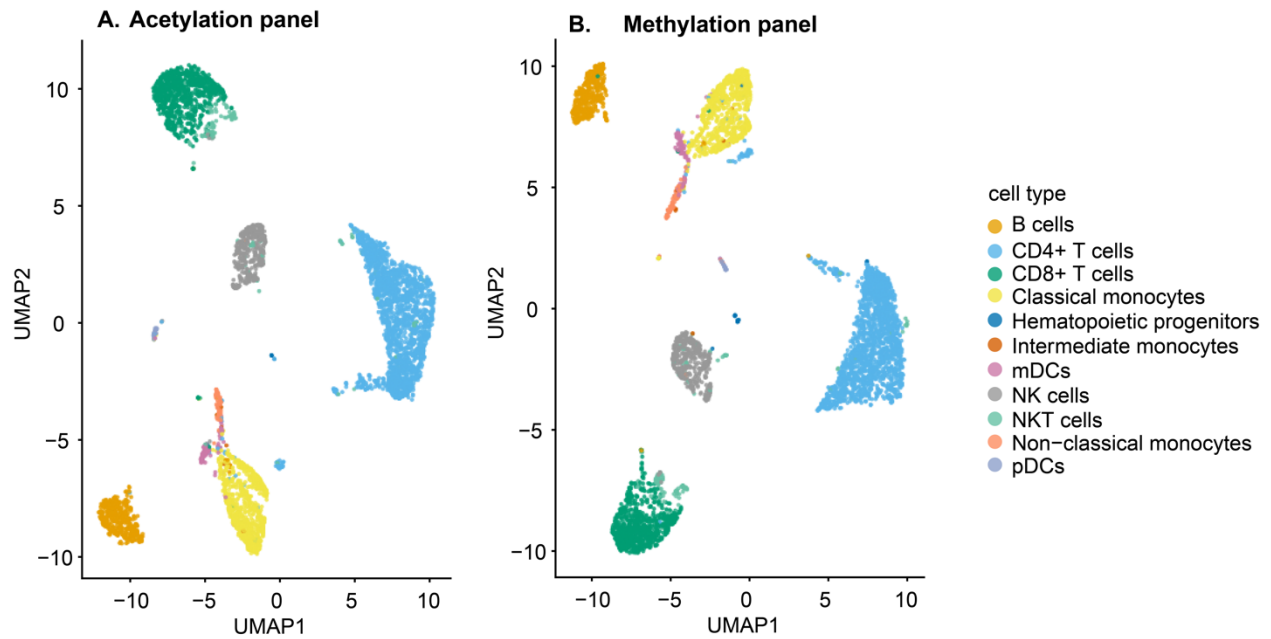

**Fig. S4. Single-cell UMAP colored by cell type identity for each acetylation and methylation panel.**

Uniform Manifold Approximation and Projection (UMAPs) were shown using cell surface markers for both the acetylation (A) and methylation (B) panels to test whether cell identities were similar between both panels. In general, similar cell identities were confirmed.

## Acetylation Panel

### A. Exposure window: 1-week

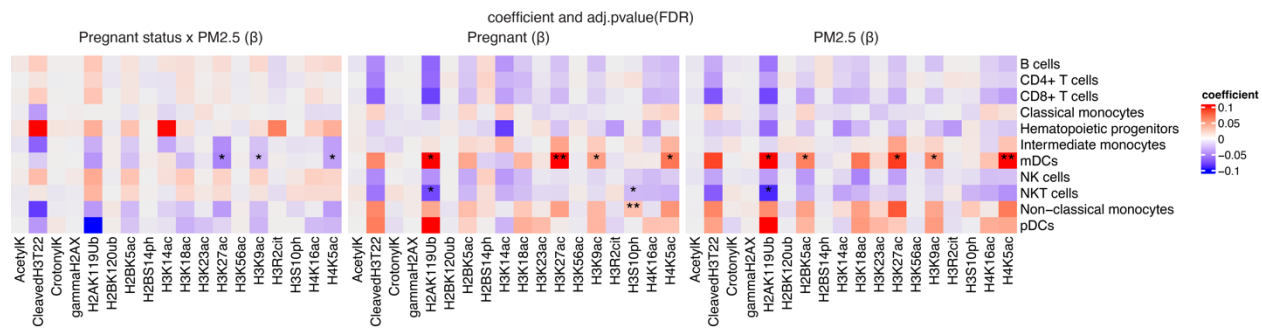

### B. Exposure window: 3-months

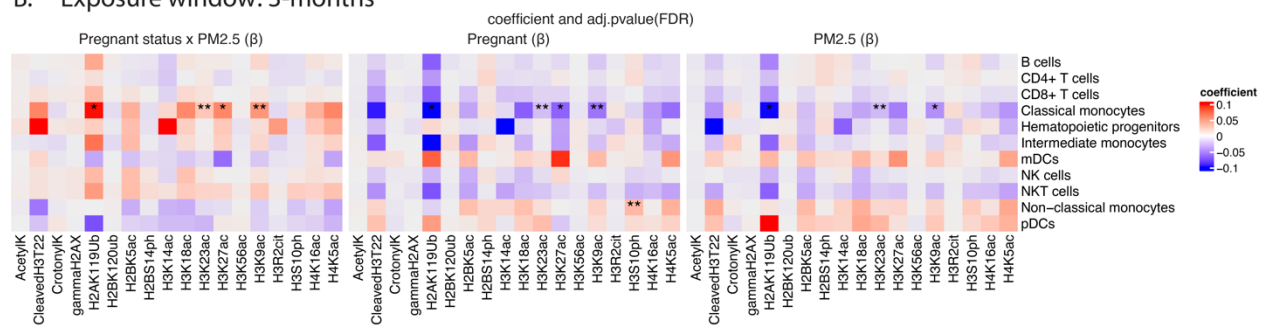

### C. Exposure window: 6-months

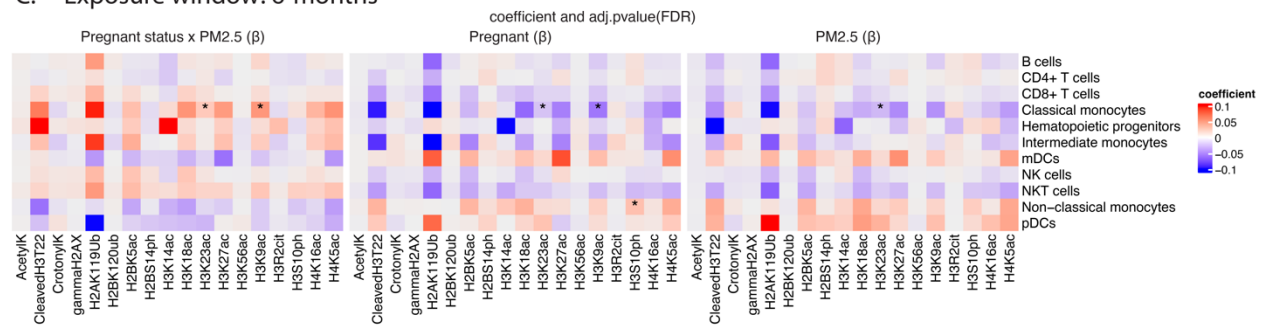

### D. Exposure window: 9-months

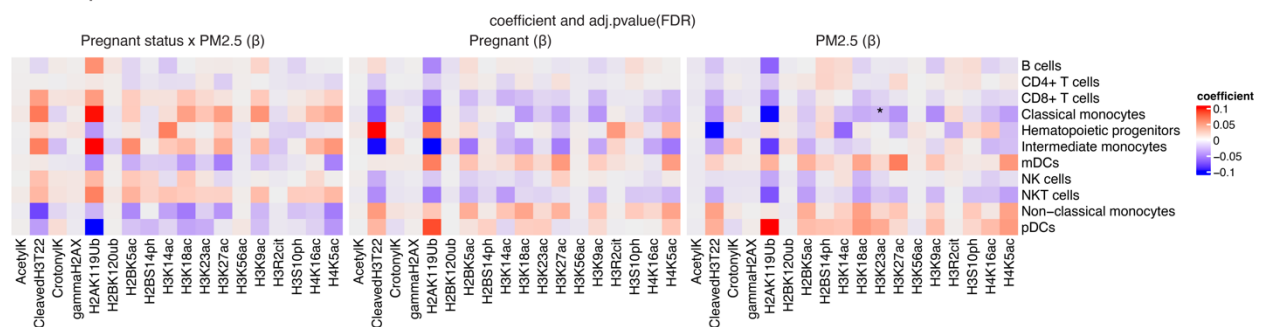

**Fig. S5 Impact of PM<sub>2.5</sub> on the acetylation panel Histone post-translational modifications (HPTMs) in 11 immune cells depending on pregnancy status**



Heatmaps summarize the beta ( $\beta$ ) coefficients and FDR-adjusted p-values (Q-values) ( $<0.05$ ) from the multivariable mixed-effect model adjusted for covariates, including age and asthma status (see method section for further details). Each row of heatmaps represents the different exposure windows, including 1-week, 3-months, 6-months, and 9-months prior to the blood collection. The x-axis of the heatmap indicates the 18 markers from the acetylation panel, and the y-axis shows the 11 immune cell types. The first column presents the differentiated effect of  $PM_{2.5}$  on pregnancy status (the interaction term between  $PM_{2.5}$  and pregnant status), the second column shows the changes in HPTM levels between pregnant and non-pregnant women, and the last column presents the changes in HPTM levels when  $PM_{2.5}$  increases by  $1\mu g/m^3$ . The color of the heatmap presents the size of the coefficient, in which red represents the positive coefficients and blue shows the negative coefficients. Significant coefficients are highlighted with significant levels. Q-values below 0.05 get one star (\*); below 0.01, two stars (\*\*); and below 0.001, three stars (\*\*\*). Descriptions for the abbreviations of HPTMs can be found in Table S2.

# Methylation Panel

## A. Exposure window: 1-week

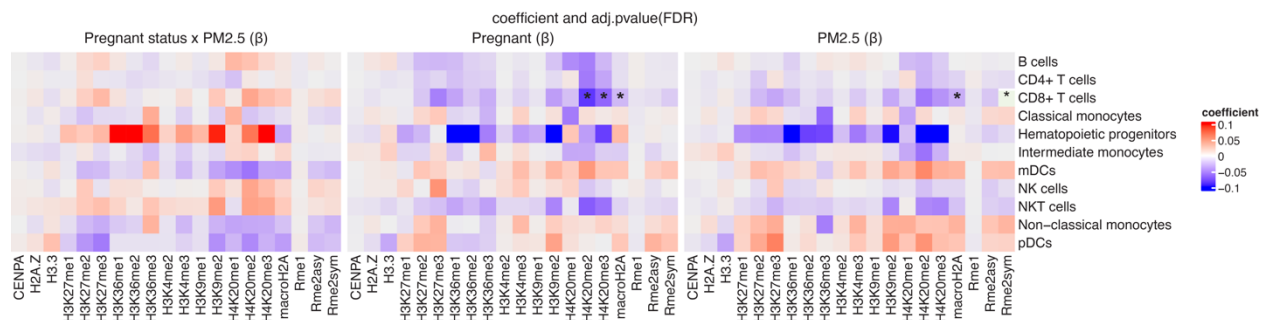

## B. Exposure window: 3-months

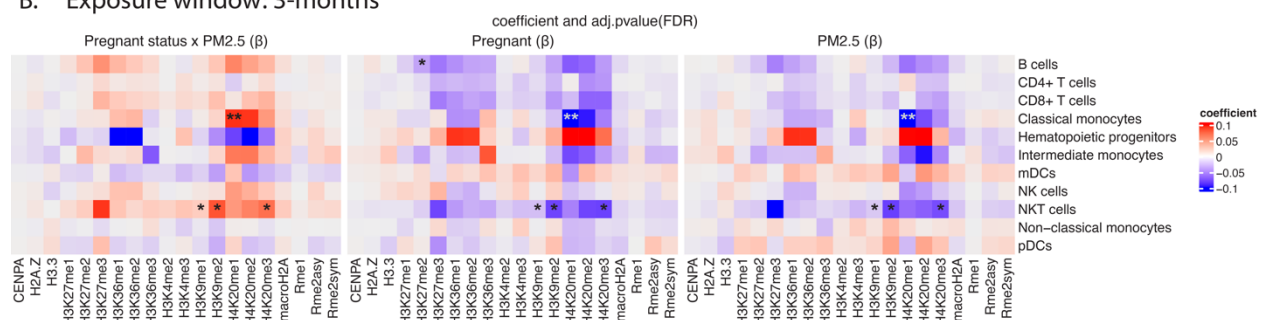

## C. Exposure window: 6-months

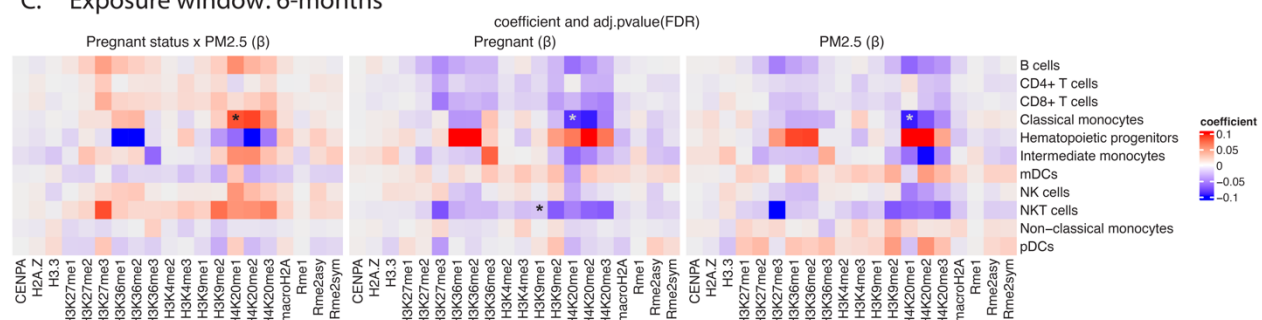

## D. Exposure window: 9-months

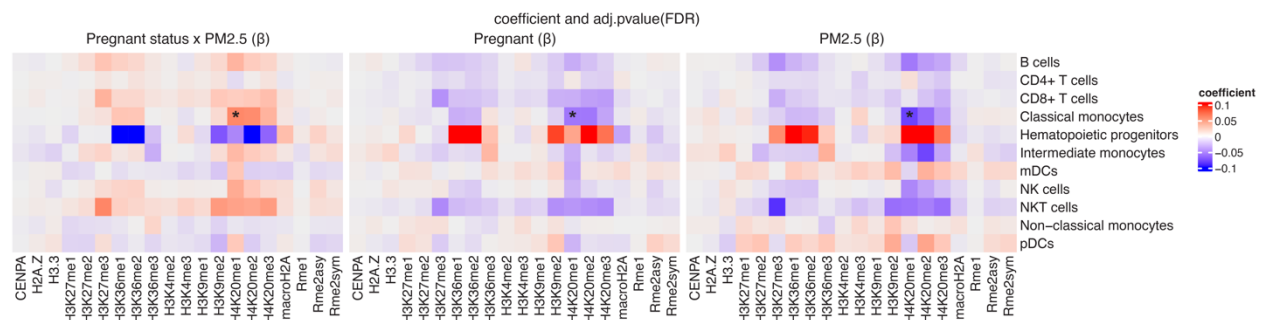

**Fig. S6 Impact of PM<sub>2.5</sub> on the methylation panel Histone post-translational modifications (HPTMs) in 11 immune cells depending on pregnancy status**

Heatmaps summarize the beta ( $\beta$ ) coefficients and FDR-adjusted p-values (Q-values) ( $<0.05$ ) from the multivariable mixed-effect model adjusted for covariates, including age and asthma status, (see method section for further details). Each row of heatmaps represents the different exposure windows, including 1-week, 3-months, 6-months, and 9-months prior to the blood collection. The x-axis of the heatmap indicates the 20 markers from the methylation panel, and the y-axis shows the 11 immune cell types. The first column presents the differentiated effect of PM<sub>2.5</sub> on pregnancy status (the interaction term between PM<sub>2.5</sub> and pregnant status), the second column shows the changes in HPTM levels between pregnant and non-pregnant women, and the last column presents the changes in HPTM levels when PM<sub>2.5</sub> increases by 1 $\mu\text{g}/\text{m}^3$ . The color of the heatmap presents the size of the coefficient, in which red represents the positive coefficients and blue shows the negative coefficients. Significant coefficients are highlighted with significant levels. Q-values below 0.05 get one star (\*); below 0.01, two stars (\*\*); and below 0.001, three stars (\*\*\*). Descriptions for the abbreviations of HPTMs can be found in Table S2.

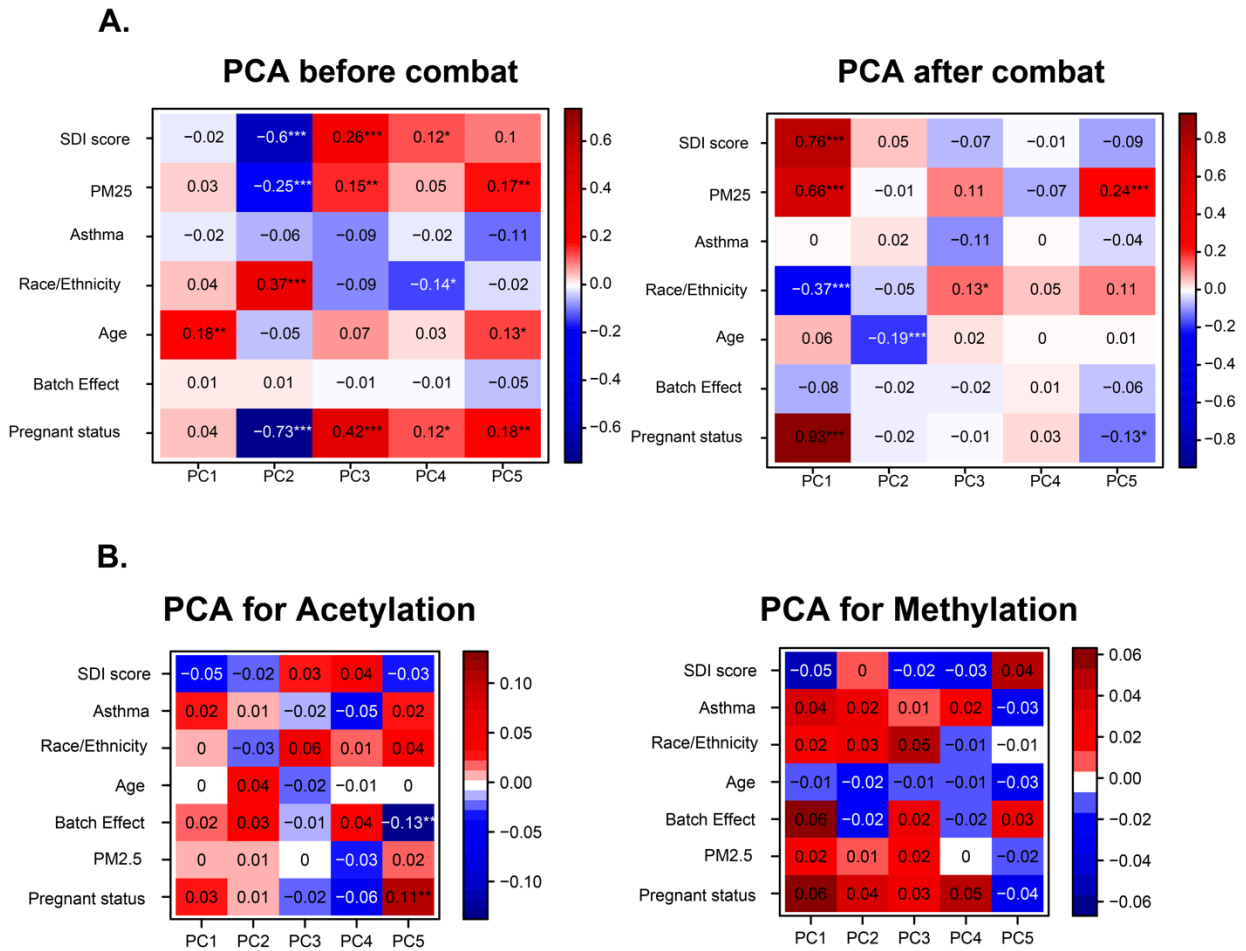

**Fig. S7. Principal component analysis (PCA) of cytokine and Histone Post-Translational Modifications (HPTM) data**

A. PCA for cytokine data: The *eigencor* plot demonstrates whether there is an effect of race/ethnicity, pregnant status (pregnant vs. non-pregnant), asthma status (asthma vs. no asthma), batch effect, PM<sub>2.5</sub> exposure level (ug/m<sup>3</sup>), age or zipcode-level social-deprivation index (SDI) on the principal components of the data. Significant effects were observed in race/ethnicity and pregnant status, and PM<sub>2.5</sub> exposure level (PC1), asthma status and age (PC2), batch effect (PC3), age (PC4), and batch effect (PC5). After adjusting for the batch effect using combat, the second *eigencor* plot shows effects race/ethnicity, pregnant status, and PM<sub>2.5</sub> exposure level (PC1), Pregnant status and asthma status (PC2), and pregnant status (PC3). We include ethnicity, asthma status, and SDI score in the statistical model as potential confounding. The scale bar represents Eigenvalues (-1 to 1, with 0 having no correlation). P-values below 0.05 get one star (\*); below 0.01, two stars (\*\*); and below 0.001, three stars (\*\*\*)

B. PCA for HPTM data: The *eigencor* plots demonstrate whether there is an effect of race/ethnicity, pregnant status (pregnant vs. non-pregnant), asthma status (asthma vs. no asthma), batch effect, PM<sub>2.5</sub> exposure level (low vs. high), age or zipcode-level social-deprivation index on the principal components for acetylation and methylation HPTM data, respectively. We include the scale bar representing Eigenvalues (-1 to 1, with 0 having no correlation). P-values below 0.05 are shown by one asterisk (\*); below 0.01, two (\*\*); and below 0.001, three (\*\*\*)

**Table S1. The average PM<sub>2.5</sub> concentration levels by exposure windows**

| Type of participants | Exposure windows                                          | Luminex<br>(average, se) | EpiTOF<br>(average, se) |
|----------------------|-----------------------------------------------------------|--------------------------|-------------------------|
| Pregnant women       | 1-week prior blood collection (ug/m <sup>3</sup> )        | 12.5 (0.44)              | 12.5 (1.00)             |
|                      | Low exposure group (%)                                    | 63.0                     | 63.9                    |
|                      | 3-months prior blood collection (ug/m <sup>3</sup> )      | 13.7 (0.35)              | 14.0 (1.04)             |
|                      | Low exposure group (%)                                    | 42.4                     | 50                      |
|                      | 6-months prior blood collection (ug/m <sup>3</sup> )      | 13.7 (0.26)              | 14.5 (0.621)            |
|                      | Low exposure group (%)                                    | 41.8                     | 36.1                    |
|                      | 9-months prior blood collection (ug/m <sup>3</sup> )      | 14.1 (0.13)              | 14.4 (0.33)             |
|                      | Low exposure group (%)                                    | 12.1                     | 5.56                    |
| Non-pregnant women   | 1-week prior blood collection (ug/m <sup>3</sup> )        | 11.7 (0.97)              | 13.0 (1.64)             |
|                      | Low exposure group (%)                                    | 75.2                     | 52.4                    |
|                      | 3-months prior blood collection (ug/m <sup>3</sup> )      | 9.80 (0.22)              | 11.8 (0.79)             |
|                      | Low exposure group (%)                                    | 73.8                     | 42.9                    |
|                      | 6-months prior blood collection (ug/m <sup>3</sup> )      | 9.20 (0.36,415)          | 10.3 (0.49)             |
|                      | Low exposure group (%)                                    | 83.4                     | 76.2                    |
|                      | 9-months prior blood collection (ug/m <sup>3</sup> )      | 8.82 (0.15)              | 9.27 (0.34)             |
|                      | Low exposure group (%)                                    | 93.1                     | 100                     |
| Neonates             | 1-week prior CB collection (ug/m <sup>3</sup> )           | 12.64 (1.09)             |                         |
|                      | Low exposure group (%)                                    | 21.2                     |                         |
|                      | 1 <sup>st</sup> trimester collection (ug/m <sup>3</sup> ) | 13.81 (0.57)             |                         |
|                      | Low exposure group (%)                                    | 36.3                     |                         |
|                      | 2 <sup>nd</sup> trimester collection (ug/m <sup>3</sup> ) | 14.05 (0.79)             |                         |
|                      | Low exposure group (%)                                    | 36.3                     |                         |
|                      | 3 <sup>rd</sup> trimester collection (ug/m <sup>3</sup> ) | 13.81 (0.57)             |                         |
|                      | Low exposure group (%)                                    | 36.3                     |                         |

**Note:** The low exposure group was defined as those with average PM<sub>2.5</sub> exposures below the 2012 EPA National Ambient Air Quality Primary Standard of 12 µg/m<sup>3</sup> (details are provided in the Methods section). The EPA standard does not imply that levels lower than the standards are safe. The pregnancy trimesters were calculated using the date of the CB collection and the number of weeks of gestation on the date of the maternal blood collection.

**Table S2. Histone Modification and their abbreviations for Panel 1 (Acetylation) and Panel 2 (Methylation)**

| Acetylation panel     |                                                           | Methylation panel |                                                 |
|-----------------------|-----------------------------------------------------------|-------------------|-------------------------------------------------|
| Abbreviation          | Description                                               | Abbreviation      | Description                                     |
| H2BK120ub             | Histone H2B ubiquitination at lysine 120                  | macroH2A          | a variant of the histone H2A                    |
| CrotonylK             | Lysine crotonylation                                      | H3K4me3           | Histone H3 trimethylation at lysine 4           |
| H3R2cit               | Histone H3 citrullination at arginine 2                   | H2A.Z             | variant of the histone H2A                      |
| H3K14ac               | Histone H3 acetylation at lysine 14                       | H3K36me1          | Histone H3 monomethylation at lysine 36         |
| H4K16ac               | Histone H4 lysine 16 acetylation                          | H4K20me1          | Histone H4 monomethylation at lysine 20         |
| H3K23ac               | Histone H3 acetylation at lysine 23.                      | H3K27me1          | Histone H3 monomethylation at lysine 27         |
| H2BS14ph              | Histone H2B phosphorylation at serine 14                  | H3K36me2          | Histone H3 dimethylation at lysine 36           |
| H3K18ac               | Histone H3 acetylation at lysine 18                       | H4K20me2          | Histone H4 dimethylation at lysine 20           |
| H3K56ac               | Histone H3 acetylation at lysine 56                       | H3.3              | A variant of the histone H3                     |
| AcetylK               | Acetylation at lysine residues                            | H4K20me3          | Histone H4 trimethylation at lysine 20          |
| gamma( $\gamma$ )H2AX | Phosphorylation of histone H2A variant H2AX at serine 139 | H3K27me3          | Histone H3 trimethylation at lysine 27          |
| H2BK5ac               | Histone H2B acetylation at lysine 5                       | Rme1              | Arginine monomethylation                        |
| H3S10ph               | Histone H3 phosphorylation at serine 10                   | Rme2sym           | symmetric arginine dimethylation                |
| H4K5ac                | Histone H4 acetylation at lysine 5                        | H3K4me2           | Histone H3 dimethylation at lysine 4            |
| CleavedH3T22          | Proteolytic cleavage of H3 histone at threonine 22        | H3K36me3          | Histone H3 trimethylation at lysine 36          |
| H3K9ac                | Histone H3 acetylation at lysine 9                        | H3K9me2           | Histone H3 dimethylation at lysine 9            |
| H2AK119Ub             | Histone H2A lysine 119 ubiquitination                     | H3K9me1           | Histone H3 monomethylation at lysine 9          |
| H3K27ac               | Histone H3 acetylation at lysine 27                       | Rme2asy           | Asymmetric arginine dimethylation               |
|                       |                                                           | H3K27me2          | Histone H3 dimethylation at lysine 27           |
|                       |                                                           | CENPA             | A variant of histone H3 found at the centromere |

**Table S3. EpiTOF Antibody for Panel 1 (Acetylation) and Panel 2 (Methylation)**

| Panel1 |                    |              |             |           |
|--------|--------------------|--------------|-------------|-----------|
| Metal  | Marker             | Manufacturer | Type        | Clone     |
| 89Y    | CD45               | Fluidigm     | Mouse IgG1  | HI30      |
| 141Pr  | H3                 | CST          | Rabbit mAb  | D1H2      |
| 142Nd  | γ-H2AX             | CST          | Rabbit mAb  | 20E3      |
| 143Nd  | H2BK5ac            | CST          | Rabbit mAb  | D5H1S     |
| 144Nd  | H3S10ph            | Active Motif | Mouse IgG1  | MABI 0312 |
| 145Nd  | CD4                | BioLegend    | Mouse IgG1  | RPA-T4    |
| 146Nd  | CD8                | BioLegend    | Mouse IgG1  | SK1       |
| 147Sm  | H4K5ac             | Active Motif | Mouse IgG1  | MABI 0405 |
| 148Nd  | CD34               | BioLegend    | Mouse IgG1  | 581       |
| 149Sm  | Cleaved H3 (Thr22) | CST          | Rabbit mAb  | D7J2K     |
| 151Eu  | H3K23ac            | RevMab       | Rabbit mAb  | RM169     |
| 152Sm  | H3K9ac             | Active Motif | Mouse IgG2a | 2G1F9     |
| 153Eu  | H2BS14ph           | CST          | Rabbit mAb  | D67H2     |
| 154Sm  | H2AK119ub          | CST          | Rabbit mAb  | D27C4     |
| 155Gd  | CD11c              | BioLegend    | Mouse IgG1  | Bu15      |
| 156Gd  | H3K18ac            | RevMab       | Rabbit mAb  | RM166     |
| 158Gd  | H3K56ac            | Active Motif | Mouse IgG1  | 12.1      |
| 159Tb  | CD14               | BioLegend    | Mouse IgG2a | M5E2      |
| 160Gd  | PADI4              | OriGene      | IgG2a       | OT14H5    |
| 161Dy  | H2BK120ub          | CST          | Rabbit mAb  | D11       |
| 163Dy  | H3R2cit            | Abcam        | Rabbit mAb  | EPR17703  |
| 164Dy  | H3K14ac            | CST          | Rabbit mAb  | D4B9      |
| 166Er  | CD33               | BioLegend    | Mouse IgG1  | WM53      |
| 167Er  | CD16               | BioLegend    | Mouse IgG1  | B73.1     |
| 168Er  | H4K16ac            | CST          | Rabbit mAb  | E2B8W     |
| 169Tm  | CD123              | BD           | Mouse IgG1  | 9F5       |
| 170Er  | CD3                | BioLegend    | Mouse IgG1  | UCHT1     |
| 171Yb  | CD38               | BioLegend    | Mouse IgG1  | HIT2      |
| 172Yb  | CD56               | BD           | Mouse       | NCAM16.2  |
| 173Yb  | H4                 | Abcam        | Mouse IgG1  | ab31830   |
| 174Yb  | H3K27ac            | Active Motif | Mouse IgG1  | MABI 0309 |
| 175Lu  | CD19               | BioLegend    | Mouse IgG1  | HIB19     |
| 176Yb  | HLA-DR             | BioLegend    | Mouse IgG2a | L243      |

| Panel2 |               |              |             |           |
|--------|---------------|--------------|-------------|-----------|
| Metal  | Marker        | Manufacturer | Type        | Clone     |
| 89Y    | CD45          | Fluidigm     | Mouse IgG1  | HI30      |
| 141Pr  | H3            | CST          | Rabbit mAb  | D1H2      |
| 142Nd  | Arg-me1       | Abcam        | Mouse IgG1  | 5D1       |
| 143Nd  | Arg-me2 (sym) | CST          | Rabbit mAb  | Unknown   |
| 144Nd  | H3K4me2       | Active Motif | Mouse IgG1  | MABI 0303 |
| 145Nd  | CD4           | BioLegend    | Mouse IgG1  | RPA-T4    |
| 146Nd  | CD8           | BioLegend    | Mouse IgG1  | SK1       |
| 147Sm  | H3K9me2       | BioLegend    | Mouse IgG1  | 5E5-G5    |
| 148Nd  | CD34          | BioLegend    | Mouse IgG1  | 581       |
| 149Sm  | H3K9me1       | BioLegend    | Mouse IgG1  | 7E7.H12   |
| 150Nd  | H3K36me3      | RevMab       | Rabbit mAb  | RM155     |
| 151Eu  | H3K27me1      | Active Motif | Mouse IgG2a | MABI 0321 |
| 152Sm  | Arg-me2 (asy) | CST          | Rabbit mAb  | Unknown   |
| 153Eu  | H3K36me2      | Active Motif | Mouse IgG1  | MABI 0332 |
| 154Sm  | H3K27me2      | Active Motif | Mouse IgG2a | MABI 0324 |
| 155Gd  | CD11c         | BioLegend    | Mouse IgG1  | Bu15      |
| 156Gd  | H4K20me2      | Active Motif | Mouse IgG2a | MABI 0422 |
| 158Gd  | H3.3          | Abcam        | Rabbit mAb  | EPR17899  |
| 159Tb  | CD14          | BioLegend    | Mouse IgG2a | M5E2      |
| 160Gd  | H4K20me3      | BioLegend    | Mouse IgG1  | 6F8-D9    |
| 161Dy  | Macro-H2A     | Millipore    | Mouse IgG2b | 14G7      |
| 162Dy  | H3K4me3       | Life         | Rabbit IgG  | G.532.8   |
| 163Dy  | H2A.Z         |              |             |           |
| 164Dy  | H3K36me1      | Abcam        | Rabbit mAb  | EPR16993  |
| 165Ho  | H3K27me3      | Active Motif | Mouse IgG1  | MABI 0323 |
| 166Er  | CD33          | BioLegend    | Mouse IgG1  | WM53      |
| 167Er  | CD16          | BioLegend    | Mouse IgG1  | B73.1     |
| 168Er  | H4K20me1      | Active Motif | Mouse IgG   | 5E10-D8   |
| 169Tm  | CD123         | BD           | Mouse IgG1  | 9F5       |
| 170Er  | CD3           | BioLegend    | Mouse IgG1  | UCHT1     |
| 171Yb  | CD38          | BioLegend    | Mouse IgG1  | HIT2      |
| 172Yb  | CD56          | BD           | Mouse IgG2b | NCAM16.2  |
| 173Yb  | H4            | Abcam        | Mouse IgG1  | ab31830   |
| 174Yb  | CENP-A        | MBL          | Mouse IgG1  | 19-Mar    |
| 175Lu  | CD19          | BioLegend    | Mouse IgG1  | HIB19     |
| 176Yb  | HLA-DR        | BioLegend    | Mouse IgG2a | L243      |

**Table S4. Antibody Sources**

| REAGENT or RESOURCE                                                       | SOURCE                    | IDENTIFIER                       |
|---------------------------------------------------------------------------|---------------------------|----------------------------------|
| Antibodies                                                                |                           |                                  |
| Rabbit monoclonal anti-Histone H3 (clone D1H2)                            | Cell Signaling Technology | 4499 (custom formulation*)       |
| Rabbit monoclonal anti-phospho-Histone H2A.X (Ser139) (clone 20E3)        | Cell Signaling Technology | 9718 (custom formulation*)       |
| Rabbit monoclonal anti-acetyl-Histone H2B (Lys5) (clone D5H1S)            | Cell Signaling Technology | 12799 (custom formulation*)      |
| Mouse monoclonal anti-phospho-Histone H3 (Ser10) (clone MABI 0312)        | Active Motif              | 39636                            |
| Mouse monoclonal anti-acetyl-Histone H4 (Lys5) (clone MABI 0405)          | Active Motif              | 61523                            |
| Rabbit monoclonal anti-cleaved-Histone H3 (Thr22) (clone D7J2K)           | Cell Signaling Technology | 12576 (custom formulation*)      |
| Rabbit monoclonal anti-acetyl-Histone H3 (Lys23) (clone RM169)            | RevMAb Biosciences        | 31-1087-00 (custom formulation*) |
| Mouse monoclonal anti-acetyl-Histone H3 (Lys9) (clone 2G1F9)              | Active Motif              | 61663                            |
| Rabbit monoclonal anti-phospho-Histone H2B (Ser14) (clone D67H2)          | Cell Signaling Technology | 6959 (custom formulation*)       |
| Rabbit monoclonal anti-ubiquityl-Histone H2A (Lys119) (clone D27C4)       | Cell Signaling Technology | 8240 (custom formulation*)       |
| Rabbit monoclonal anti-acetyl-Histone H3 (Lys18) (clone RM166)            | RevMAb Biosciences        | 31-1055-00 (custom formulation*) |
| Mouse monoclonal anti-acetyl-Histone H3 (Lys56) (clone 12.1)              | Active Motif              | 61061                            |
| Mouse monoclonal anti-peptidylarginine deaminase 4 (PADI4) (clone OTI4H5) | OriGene                   | CF504813                         |
| Rabbit monoclonal anti-ubiquityl-Histone H2B (Lys120) (clone D11)         | Cell Signaling Technology | 5546 (custom formulation*)       |
| Rabbit monoclonal anti-citrullinated-Histone H3 (Arg2) (clone EPR17703)   | abcam                     | ab176843                         |
| Rabbit monoclonal anti-acetyl-Histone H3 (Lys14) (clone D4B9)             | Cell Signaling Technology | 7627 (custom formulation*)       |
| Rabbit monoclonal anti-acetyl-Histone H4 (Lys16) (clone E2B8W)            | Cell Signaling Technology | 13534 (custom formulation*)      |
| Mouse monoclonal anti-Histone H4 (clone 31830)                            | abcam                     | ab31830                          |
| Mouse monoclonal anti-acetyl-Histone H3 (Lys27) (clone MABI 0309)         | Active Motif              | 39685                            |
| Mouse monoclonal anti-monomethylarginine (MMA) (clone 5D1)                | abcam                     | ab415                            |
| Rabbit monoclonal antisymmetric dimethylarginine (SDMA)                   | Cell Signaling Technology | 13222 (custom formulation*)      |
| Mouse monoclonal anti-dimethyl-Histone H3 (Lys4) (clone MABI 0303)        | Active Motif              | 39679                            |
| Mouse monoclonal anti-dimethyl-Histone H3 (Lys9) (clone 5E5-G5)           | BioLegend                 | 815501                           |
| Mouse monoclonal anti-monomethyl-Histone H3 (Lys9) (clone 7E7.H12)        | BioLegend                 | 824201                           |
| Rabbit monoclonal anti-trimethyl-Histone H3 (Lys36) (clone RM155)         | RevMAb Biosciences        | 31-1051-00 (custom formulation*) |



|                                                                       |                           |                                 |
|-----------------------------------------------------------------------|---------------------------|---------------------------------|
| Mouse monoclonal anti-monomethyl-Histone H3 (Lys27) (clone MABI 0321) | Active Motif              | 61015                           |
| Rabbit monoclonal anti-asymmetric dimethylarginine (ADMA)             | Cell Signaling Technology | 13522 (custom formulation*)     |
| Mouse monoclonal anti-dimethyl-Histone H3 (Lys36) (clone MABI 0332)   | Active Motif              | 61019                           |
| Mouse monoclonal anti-dimethyl-Histone H3 (Lys27) (clone MABI 0324)   | Active Motif              | 61435                           |
| Mouse monoclonal anti-dimethyl-Histone H4 (Lys20) (clone MABI 0422)   | Active Motif              | 61533                           |
| Rabbit monoclonal anti-Histone H3.3 (clone EPR17899)                  | abcam                     | ab176840                        |
| Mouse monoclonal anti-trimethyl-Histone H4 (Lys20) (clone 6F8-D9)     | BioLegend                 | 827701                          |
| Mouse monoclonal anti-macroH2A (clone 14G7)                           | Millipore                 | MABE61                          |
| Mouse monoclonal anti-trimethyl-Histone H3 (Lys4) (clone G.532.8)     | ThermoFisher              | MA5-11199 (custom formulation*) |
| Rabbit monoclonal anti-Histone H2A.Z (clone EPR6171(2)(B))            | abcam                     | ab150402                        |
| Rabbit monoclonal anti-monomethyl-Histone H3 (Lys36) (clone EPR16993) | abcam                     | ab176920                        |
| Mouse monoclonal anti-trimethyl-Histone H3 (Lys27) (clone MABI 0323)  | Active Motif              | 61017                           |
| Mouse monoclonal anti-monomethyl-Histone H4 (Lys20) (clone 5E10-D8)   | BioLegend                 | 828001                          |
| Mouse monoclonal anti-CENP-A (clone 3-19)                             | MBL                       | D115-3                          |
| Mouse monoclonal anti-human CD45 <sup>89Y</sup> (clone H130)          | Fluidigm                  | 3089003B                        |
| Mouse monoclonal anti-human CD4 (clone RPA-T4)                        | BioLegend                 | 300541                          |
| Mouse monoclonal anti-human CD8 (clone SK1)                           | BioLegend                 | 344727                          |
| Mouse monoclonal anti-human CD34 (clone 581)                          | BioLegend                 | 343531                          |
| Mouse monoclonal anti-human CD11c (clone Bu15)                        | BioLegend                 | 337221                          |
| Mouse monoclonal anti-human CD14 (clone M5E2)                         | BioLegend                 | 301843                          |
| Mouse monoclonal anti-human CD33 (clone WM53)                         | BioLegend                 | 303419                          |
| Mouse monoclonal anti-human CD16 (clone B73.1)                        | BioLegend                 | 360702                          |
| Mouse monoclonal anti-human CD123 (clone 9F5)                         | BD                        | 555642                          |
| Mouse monoclonal anti-human CD3 (clone UCHT1)                         | BioLegend                 | 300443                          |
| Mouse monoclonal anti-human CD38 (clone HIT2)                         | BioLegend                 | 303535                          |
| Mouse monoclonal anti-human CD56 (clone NCAM16.2)                     | BD                        | 559043                          |
| Mouse monoclonal anti-human CD19 (clone HIB19)                        | BioLegend                 | 302247                          |
| Mouse monoclonal anti-human HLA-DR (clone L243)                       | BioLegend                 | 307651                          |

\* Custom formulation: PBS, > 1 mg/mL, carrier-free, azide-free
